# Supplementary material for: Allogeneic Stem Cell Therapy for Acute Ischemic Stroke: The Phase 2/3 TREASURE Randomized Clinical Trial
Source: PubMed Central journal article supplement — JAMA Neurol. 2024 Jan 16;81(2):154–62. doi: 10.1001/jamaneurol.2023.5200 (PMC10792497; doi:10.1001/jamaneurol.2023.5200), 2024-01-16
Supplement: jamaneurol-e235200-s003.pdf [file jamaneurol-e235200-s003.pdf]

**Supplement 3. Nonauthor Collaborators**

\*First name, last name, and suffix (if applicable) are required and will appear in PubMed.

| <b>*Group Name(s): TREASURE Study Investigators</b> |                   |                              |                  |                                                         |                                          |                                                         |                                                                                            |
|-----------------------------------------------------|-------------------|------------------------------|------------------|---------------------------------------------------------|------------------------------------------|---------------------------------------------------------|--------------------------------------------------------------------------------------------|
| <b>*First Name and Middle Initial(s)</b>            | <b>*Last Name</b> | <b>*Suffix (eg, Jr, III)</b> | Academic Degrees | Institution                                             | Location (city, state/province, country) | Role or Contribution, eg, chair, principal investigator | Group (if more than 1 Group listed in the byline and/or Subgroup (eg, Steering Committee)) |
| Kiyohiro                                            | Houkin            |                              | MD               | Hokkaido University Hospital                            |                                          |                                                         |                                                                                            |
| Toshiya                                             | Osanai            |                              | MD               | Hokkaido University Hospital                            |                                          |                                                         |                                                                                            |
| Katsuhiko                                           | Maruichi          |                              | MD               | Kashiwaba Neurosurgical Hospital                        |                                          |                                                         |                                                                                            |
| Yoshimasa                                           | Niiya             |                              | MD               | Otaru General Hospital                                  |                                          |                                                         |                                                                                            |
| Katsuyuki                                           | Asaoka            |                              | MD               | Teine Keijinkai Medical Center                          |                                          |                                                         |                                                                                            |
| Katsumi                                             | Takizawa          |                              | MD               | Japanese Red Cross Asahikawa Hospital                   |                                          |                                                         |                                                                                            |
| Kouichi                                             | Haraguchi         |                              | MD               | Hakodate Shintoshu Hospital                             |                                          |                                                         |                                                                                            |
| Rokuya                                              | Tanikawa          |                              | MD               | Sapporo Teishinkai Hospital                             |                                          |                                                         |                                                                                            |
| Akira                                               | Tempaku           |                              | MD               | Hokuto Hospital                                         |                                          |                                                         |                                                                                            |
| Yusuke                                              | Shimoda           |                              | MD               | Hokkaido Medical Center                                 |                                          |                                                         |                                                                                            |
| Masanori                                            | Isobe             |                              | MD               | Kushiro Rosai Hospital                                  |                                          |                                                         |                                                                                            |
| Kenji                                               | Kamiyama          |                              | MD               | Nakamura Memorial Hospital                              |                                          |                                                         |                                                                                            |
| Masafumi                                            | Ohtaki            |                              | MD               | Obihiro Kosei General Hospital                          |                                          |                                                         |                                                                                            |
| Norihito                                            | Shimamura         |                              | MD               | Hirosaki University Hospital                            |                                          |                                                         |                                                                                            |
| Junta                                               | Moroi             |                              | MD               | Akita Cerebrospinal and Cardiovascular Center           |                                          |                                                         |                                                                                            |
| Aiki                                                | Marushima         |                              | MD               | University of Tsukuba Hospital                          |                                          |                                                         |                                                                                            |
| Shinichi                                            | Takahashi         |                              | MD               | Saitama Medical University International Medical Center |                                          |                                                         |                                                                                            |
| Takao                                               | Urabe             |                              | MD               | Juntendo University Urayasu Hospital                    |                                          |                                                         |                                                                                            |
| Teruyuki                                            | Hirano            |                              | MD               | Kyorin University Hospital                              |                                          |                                                         |                                                                                            |
| Kazumi                                              | Kimura            |                              | MD               | Nippon Medical School Hospital                          |                                          |                                                         |                                                                                            |
| Kazuo                                               | Kitagawa          |                              | MD               | Tokyo Women's Medical University Hospital               |                                          |                                                         |                                                                                            |

**Supplement 3. Nonauthor Collaborators**

\*First name, last name, and suffix (if applicable) are required and will appear in PubMed.

| *First Name and Middle Initial(s) | *Last Name | *Suffix (eg, Jr, III) | Academic Degrees | Institution                                                      | Location (city, state/province, country) | Role or Contribution, eg, chair, principal investigator | Group (if more than 1 Group listed in the byline) and/or Subgroup (eg, Steering Committee) |
|-----------------------------------|------------|-----------------------|------------------|------------------------------------------------------------------|------------------------------------------|---------------------------------------------------------|--------------------------------------------------------------------------------------------|
| Hidetoshi                         | Kasuya     |                       | MD               | Tokyo Women's Medical University Hospital, Adachi Medical Center |                                          |                                                         |                                                                                            |
| Yoshikane                         | Izawa      |                       | MD               | Keio University Hospital                                         |                                          |                                                         |                                                                                            |
| Yasuyuki                          | Iguchi     |                       | MD               | The Jikei University Hospital                                    |                                          |                                                         |                                                                                            |
| Koichi                            | Oki        |                       | MD               | Tokyo Saiseikai Central Hospital                                 |                                          |                                                         |                                                                                            |
| Koichi                            | Kato       |                       | MD               | Tokyo Rosai Hospital                                             |                                          |                                                         |                                                                                            |
| Yoshihisa                         | Yamano     |                       | MD               | St. Marianna University Hospital                                 |                                          |                                                         |                                                                                            |
| Satoshi                           | Kuroda     |                       | MD               | Toyama University Hospital                                       |                                          |                                                         |                                                                                            |
| Atsushi                           | Sato       |                       | MD               | Ina Central Hospital                                             |                                          |                                                         |                                                                                            |
| Chikanori                         | Inenaga    |                       | MD               | Seirei Hamamatsu General Hospital                                |                                          |                                                         |                                                                                            |
| Keizo                             | Yasui      |                       | MD               | Japanese Red Cross Aichi Medical Center Nagoya Daini Hospital    |                                          |                                                         |                                                                                            |
| Kazunori                          | Toyoda     |                       | MD               | National Cerebral and Cardiovascular Center                      |                                          |                                                         |                                                                                            |
| Shinichi                          | Yoshimura  |                       | MD               | Hyogo Medical University Hospital                                |                                          |                                                         |                                                                                            |
| Nobuyuki                          | Sakai      |                       | MD               | Kobe City Medical Center General Hospital                        |                                          |                                                         |                                                                                            |
| Yoshihiro                         | Kuga       |                       | MD               | Ohnishi Neurological Center                                      |                                          |                                                         |                                                                                            |
| Atsuo                             | Aoyama     |                       | MD               | Shimane Prefectureal Central Hospital                            |                                          |                                                         |                                                                                            |
| Fusao                             | Ikawa      |                       | MD               | Shimane Prefectural Central Hospital                             |                                          |                                                         |                                                                                            |
| Koji                              | Tokunaga   |                       | MD               | Okayama City Hospital                                            |                                          |                                                         |                                                                                            |
| Atsushi                           | Tominaga   |                       | MD               | Hiroshima Prefectural Hospital                                   |                                          |                                                         |                                                                                            |
| Yasushi                           | Takagi     |                       | MD               | Tokushima University Hospital                                    |                                          |                                                         |                                                                                            |
| Masahiro                          | Yasaka     |                       | MD               | Kyushu Medical Center                                            |                                          |                                                         |                                                                                            |

**Supplement 3. Nonauthor Collaborators**

\*First name, last name, and suffix (if applicable) are required and will appear in PubMed.

| <b>*First Name and Middle Initial(s)</b> | <b>*Last Name</b> | <b>*Suffix (eg, Jr, III)</b> | <b>Academic Degrees</b> | <b>Institution</b>                   | <b>Location (city, state/province, country)</b> | <b>Role or Contribution, eg, chair, principal investigator</b> | <b>Group (if more than 1 Group listed in the byline) and/or Subgroup (eg, Steering Committee)</b> |
|------------------------------------------|-------------------|------------------------------|-------------------------|--------------------------------------|-------------------------------------------------|----------------------------------------------------------------|---------------------------------------------------------------------------------------------------|
| Tatsuya                                  | Abe               |                              | MD                      | Saga University Hospital             |                                                 |                                                                |                                                                                                   |
| Takayuki                                 | Matsuo            |                              | MD                      | Nagasaki University Hospital         |                                                 |                                                                |                                                                                                   |
| Toshiro                                  | Yonehara          |                              | MD                      | Saiseikai Kumamoto Hospital          |                                                 |                                                                |                                                                                                   |
| Tadashi                                  | Terasaki          |                              | MD                      | Japanese Red Cross Kumamoto Hospital |                                                 |                                                                |                                                                                                   |
| Hideki                                   | Matsuoka          |                              | MD                      | Kagoshima Medical Center             |                                                 |                                                                |                                                                                                   |
