# Supplementary material for: Allogeneic Stem Cell Therapy for Acute Ischemic Stroke: The Phase 2/3 TREASURE Randomized Clinical Trial
Source: PubMed Central journal article supplement — JAMA Neurol. 2024 Jan 16;81(2):154–62. doi: 10.1001/jamaneurol.2023.5200 (PMC10792497; doi:10.1001/jamaneurol.2023.5200), 2024-01-16
Supplement: jamaneurol-e235200-s004.pdf [file jamaneurol-e235200-s004.pdf]

## Data Sharing Statement

Houkin. Allogeneic Stem Cell Therapy for Acute Ischemic Stroke. *JAMA Neurol*. Published January 16, 2024. doi:10.1001/jamaneurol.2023.5200

### Data

**Data available:** No

### Additional Information

**Explanation for why data not available:** MultiStem is currently in clinical development and is restricted to those directly involved in the trial; it is not available to others at this time.
